# Supplementary material for: Coalescing traditions—Coalescing people: Community formation in Pannonia after the decline of the Roman Empire
Source: PubMed Central journal article supplement (PMC7190109; doi:10.1371/journal.pone.0231760), 2020-04-29

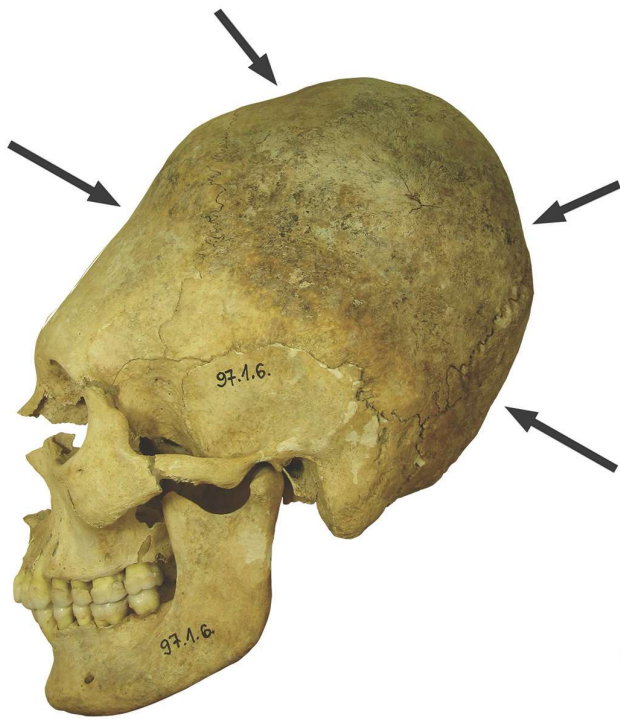

*Grave 34*

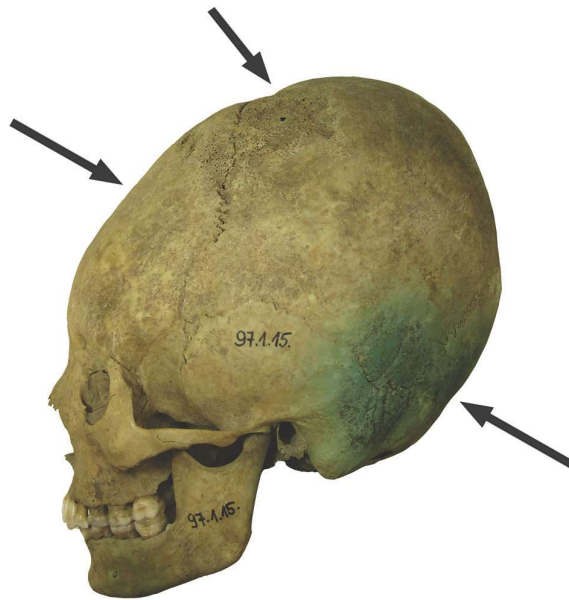

*Grave 43*

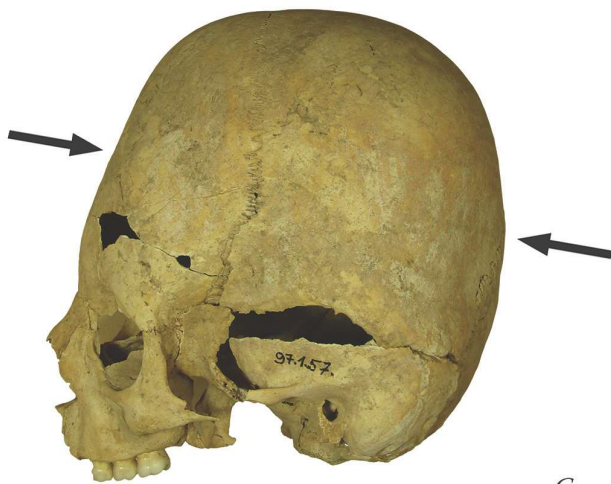

*Grave 85*

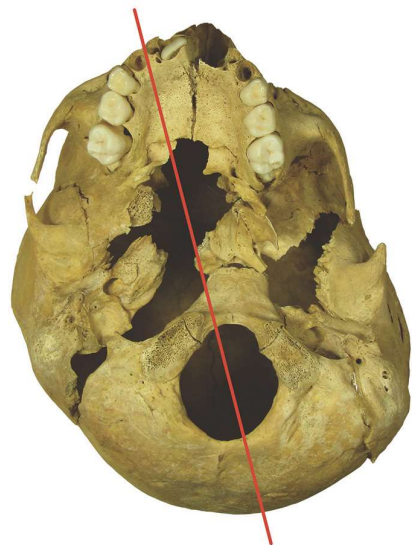

Supplement: pone.0231760.s002.pdf [file pone.0231760.s002.pdf]
