# Supplementary material for: Coalescing traditions—Coalescing people: Community formation in Pannonia after the decline of the Roman Empire
Source: PubMed Central journal article supplement (PMC7190109; doi:10.1371/journal.pone.0231760), 2020-04-29
Supplement: pone.0231760.s007.pdf [file pone.0231760.s007.pdf]

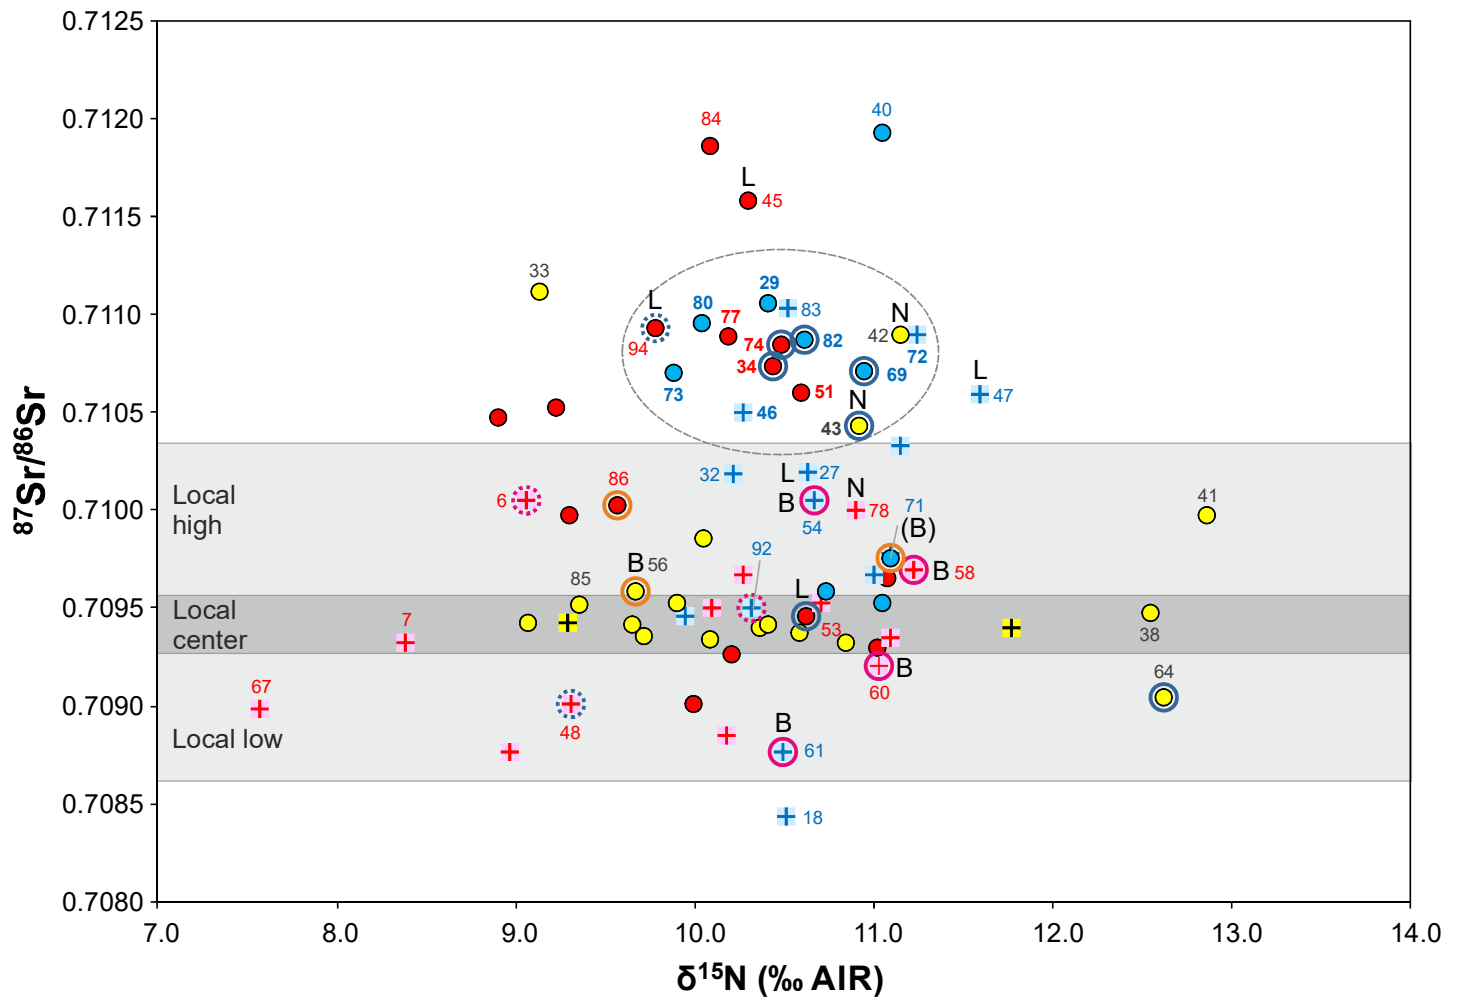

|                                           | Infans I/II   | Female | Male | Ind.                           |
|-------------------------------------------|---------------|--------|------|--------------------------------|
| Individuals with modified deformed skulls |               |        |      |                                |
| Individuals with non-modified skulls      |               |        |      |                                |
| B Brick construction                      | L Ledge grave |        |      | Early / probably early burials |
| (B) Symbolic brick construction           | N Niche grave |        |      | Late / probably late burials   |
|                                           |               |        |      | Cultural amalgamation          |
