# Supplementary material for: Coalescing traditions—Coalescing people: Community formation in Pannonia after the decline of the Roman Empire
Source: PubMed Central journal article supplement (PMC7190109; doi:10.1371/journal.pone.0231760), 2020-04-29
Supplement: pone.0231760.s008.pdf [file pone.0231760.s008.pdf]

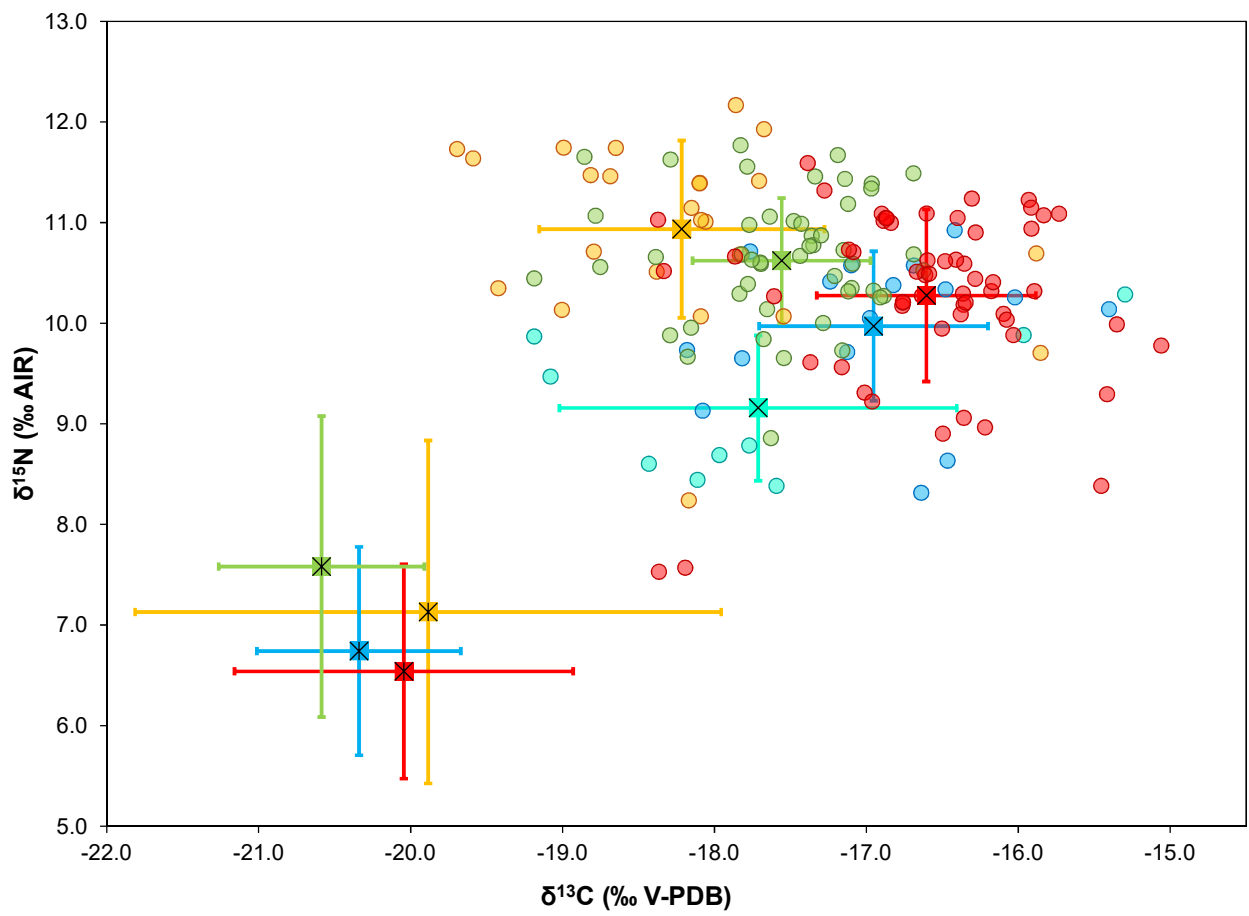

- |                               |                           |                               |
|-------------------------------|---------------------------|-------------------------------|
| ● Keszthely-Fenekpuszta (KFP) | ● Hács-Béndekpuszta (HAC) | ● Győr-Széchenyi Square (GYS) |
| ● Szolnok-Skanda (SZO)        | ● Mőzs (MÖZS)             | ● KFP adult mean              |
| ● HAC adult mean              | ● GYS adult mean          | ● SZO adult mean              |
| ● Mőzs adult mean             | ● GYS animals mean        | ● KFP animals mean            |
| ● Mőzs animals mean           | ● SZO animals mean        |                               |
