# Supplementary material for: Coalescing traditions—Coalescing people: Community formation in Pannonia after the decline of the Roman Empire
Source: PLoS One. 2020 Apr 29;15(4):e0231760. doi: 10.1371/journal.pone.0231760 (PMC7190109; doi:10.1371/journal.pone.0231760)
Supplement: S4 Fig — The individuals are grouped according to burial groups A, B and C, and within these groups by subadult individuals as well as adult females and males. Within each group, the data are sorted from lower to higher values. See text for definition of the local strontium isotope ranges. (PDF) [file pone.0231760.s005.pdf]

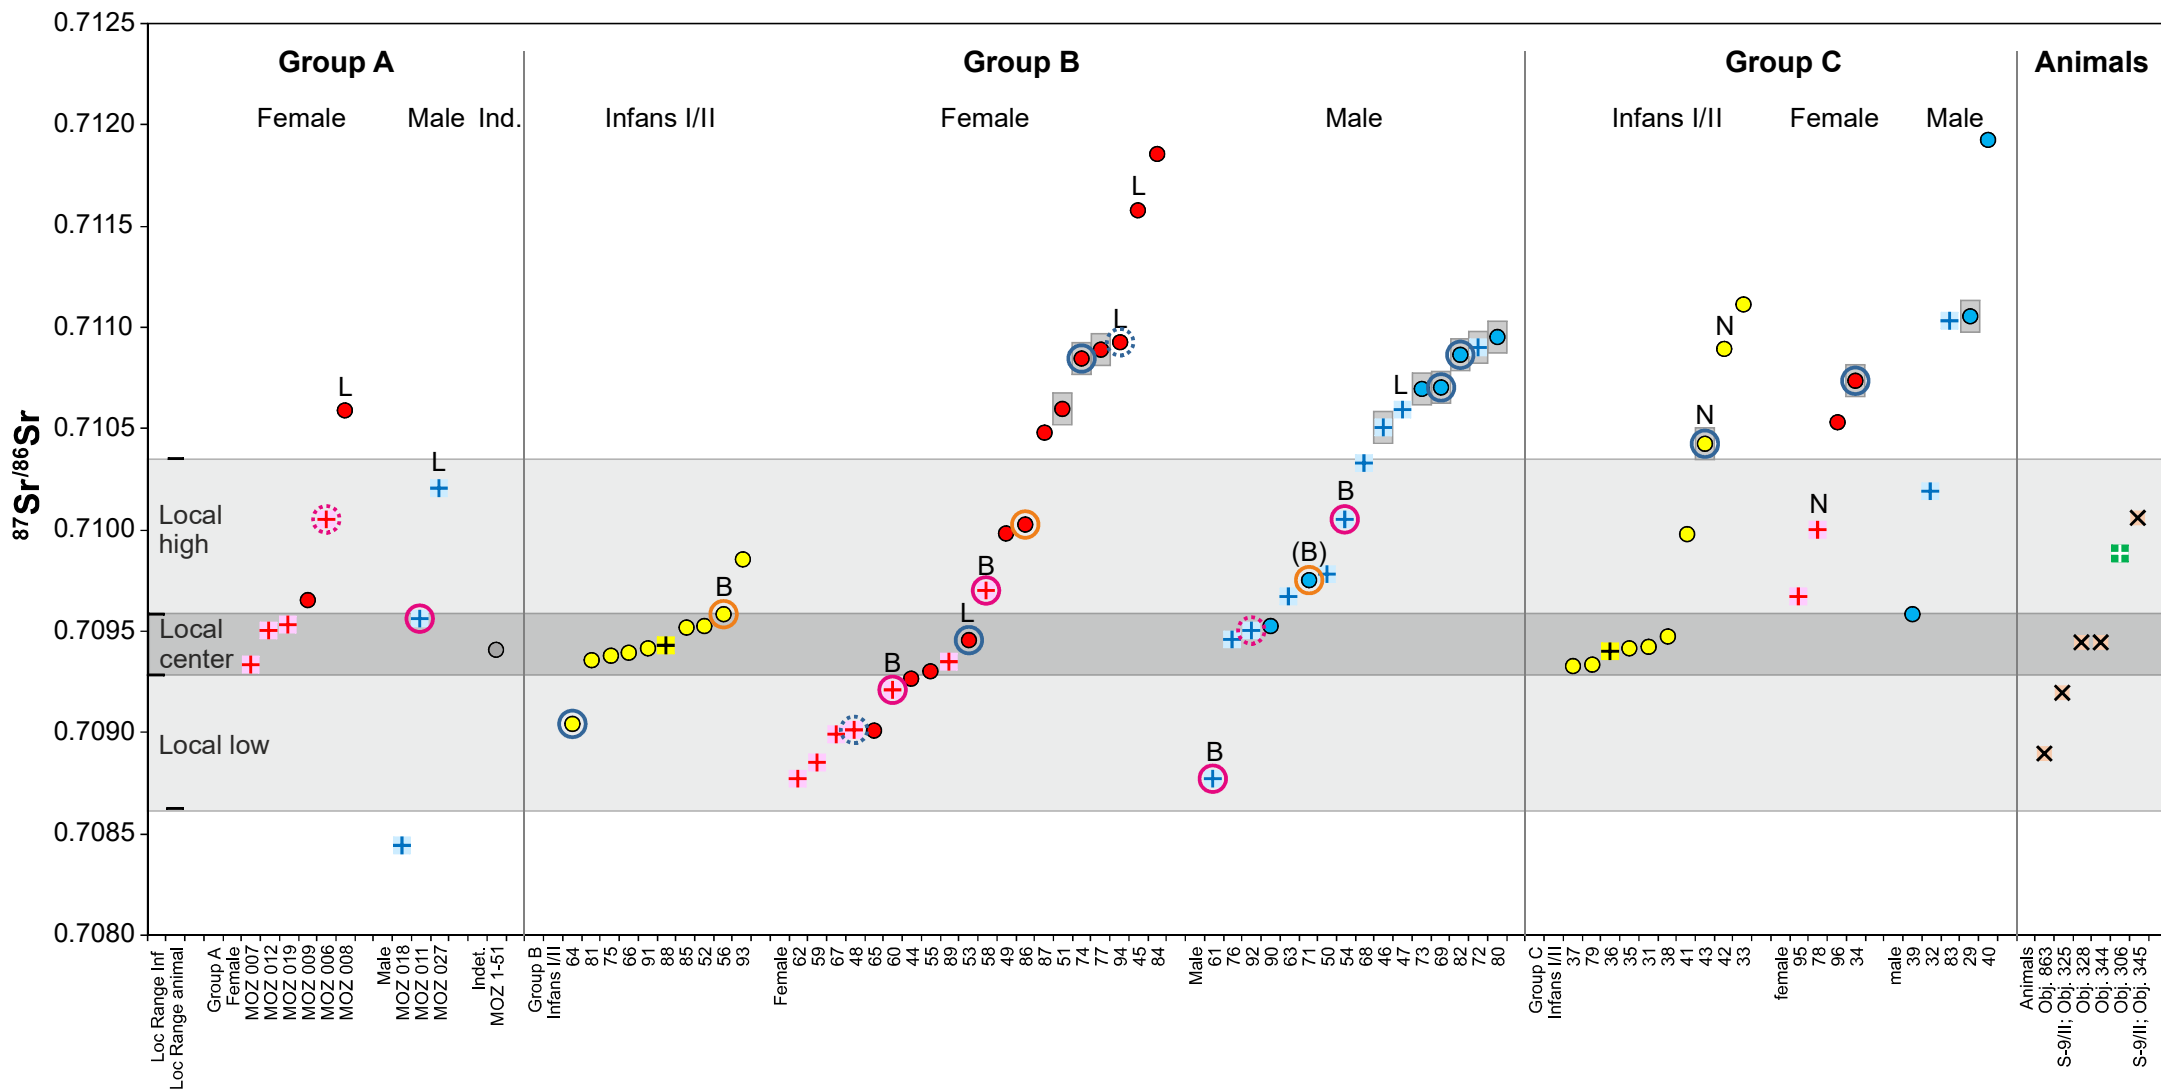

Individuals with artificially modified skulls

Individuals with non-modified skulls

Infans I/II

Female

Male

Ind.

B Brick construction

(B) Symbolic brick construction

L Ledge grave

N Niche grave

Early / probably early burials

Late / probably late burials

Similar Sr, C, and N isotope ratios

Cultural amalgamation
