# Supplementary material for: Coalescing traditions—Coalescing people: Community formation in Pannonia after the decline of the Roman Empire
Source: PLoS One. 2020 Apr 29;15(4):e0231760. doi: 10.1371/journal.pone.0231760 (PMC7190109; doi:10.1371/journal.pone.0231760)
Supplement: S5 Fig — The data are grouped according to sex and the presence or absence of artificial skull modifications. Representatives of the supposed founder generation (*), indication of inhumation in the 3rd quarter of the 5th century (°), and individuals with similar C, N and Sr isotope data (‘) are labelled. (PDF) [file pone.0231760.s006.pdf]

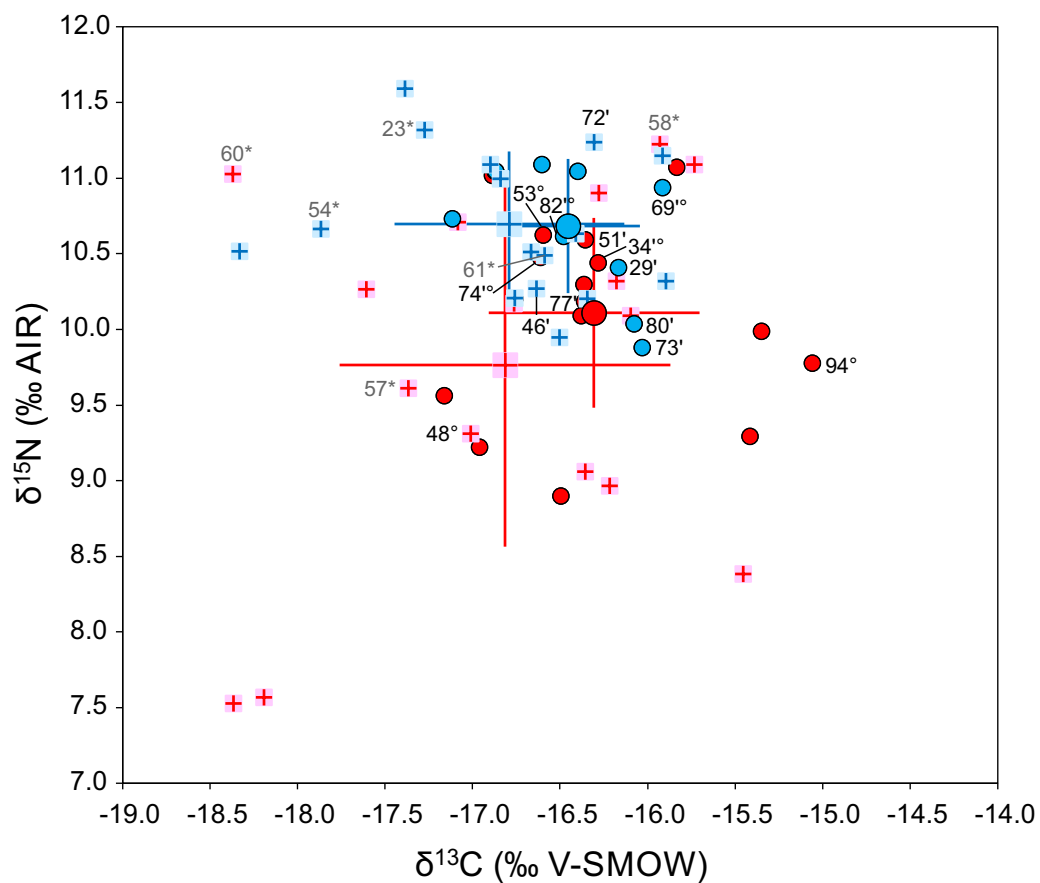

- Females with modified skulls
- Mean females with modified skulls
- + Females with non-modified skulls
- + Mean of females with non-modified skulls
- Males with modified skulls
- Mean of males with modified skulls
- + Males with non-modified skulls
- + Mean of males with non-modified skulls
